# Supplementary material for: Agrin Promotes Non-Small Cell Lung Cancer Progression and Stimulates Regulatory T Cells via Increasing IL-6 Secretion Through PI3K/AKT Pathway
Source: PubMed Central journal article supplement (PMC8801576; doi:10.3389/fonc.2021.804418), 2022-01-17
Supplement: DataSheet_1.pdf [file DataSheet_1.pdf]

**Table S1** | Antibody information.

| <b>Antibody</b>       | <b>Dilution</b> | <b>Company</b>            |
|-----------------------|-----------------|---------------------------|
| Agrin (A17320)        | 1:1000          | Abclonal                  |
| Agrin (160842)        | 1:100           | ZEN BIO                   |
| AKT (4691)            | 1:1000          | Cell Signaling Technology |
| CD8 (ab217344)        | 1:2000          | Abcam                     |
| CDK6 (14052-1-AP)     | 1:1000          | Proteintech               |
| CDK4 (11026-1-AP)     | 1:1000          | Proteintech               |
| CDK2 (10122-1-AP)     | 1:1000          | Proteintech               |
| CyclinD1 (26939-1-AP) | 1:1000          | Proteintech               |
| CyclinE1 (11554-1-AP) | 1:1000          | Proteintech               |
| E-Cadherin (A3044)    | 1:1000          | Abclonal                  |
| Foxp3 (ab20034)       | 1:1000          | Abcam                     |
| GAPDH (10494-1-AP)    | 1:5000          | Proteintech               |
| IL-6 (A0286)          | 1:1000          | Abclonal                  |
| Ki67 (27309-1-AP)     | 1:200           | Abcam                     |
| MMP9 (A2095)          | 1:1000          | Abclonal                  |
| N-Cadherin (A19083)   | 1:1000          | Abclonal                  |
| pAKT (4060)           | 1:1000          | Cell Signaling Technology |
| pAKT (AP0140)         | 1:100           | Abclonal                  |
| Vimentin (A19607)     | 1:1000          | Abclonal                  |

**Table S2** | qPCR primer sequences.

| <b>Gene</b> | <b>sequences or target sequence (5' - 3')</b> |
|-------------|-----------------------------------------------|
| Agrin-F     | ACGGAGTCACCTACGAAAACG                         |
| Agrin-R     | AGCAATCACTGTCATACGTGC                         |
| CTLA4-F     | AGGTGACTGAAGTCTGTGCG                          |
| CTLA4-R     | CATGAGCTCCACCTTGCAGA                          |
| FOXP3-F     | TACCACAATATGCGACCCCC                          |
| FOXP3-R     | GGCGAACATGCGAGTAAACC                          |
| GAPDH-F     | CATCATCCCTGCCTCTACTGG                         |
| GAPDH-R     | GTGGGTGTCGCTGTTGAAGTC                         |
| GZMB-F      | CAGCTGGAGAGAAAGGCCAA                          |
| GZMB-R      | TGGCGTAAGTCAGATTGCGCA                         |
| IL-10-F     | AAGACCCAGACATCAAGGCG                          |
| IL-10-R     | AGGCATTCTTACCTGCTCC                           |
| IL-6-F      | GCCGCATCGCCGTCTCCTAC                          |
| IL-6-R      | CCTCAGCCCCCTCTGGGGTC                          |
| PRF1-F      | TCCTAAGCCCACCAGCAATG                          |
| PRF1-R      | AAGGAGGCCGTCATCTTGTG                          |
| TGF-b1-F    | ACATTGACTTCCGCAAGGAC                          |
| TGF-b1-R    | CCGGGTTATGCTGGTTGTA                           |

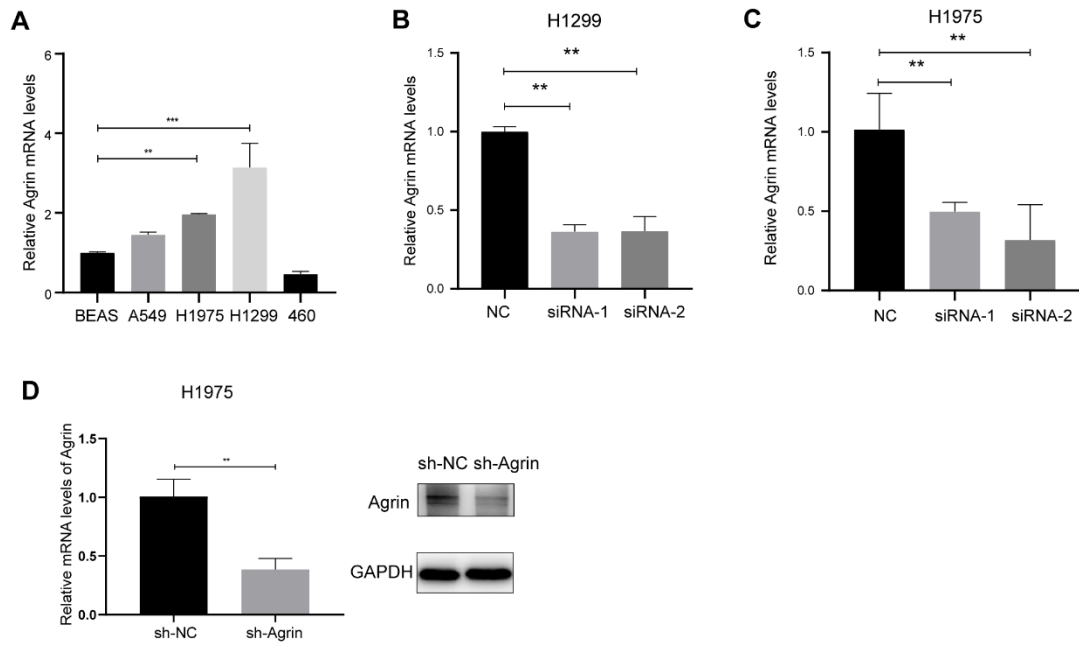

**Figure S1** | The expression and downregulation of Agrin in NSCLC cells. **(A)** The mRNA levels of Agrin in NSCLC and lung epithelial cells. **(B, C)** Verification of Agrin knockdown efficiency in H1299 and H1975 cells. **(D)** Stable knockdown of Agrin in H1975 cells. Relative Agrin mRNA levels in sh-NC and sh-Agrin H1975 cells (left), representative immunoblots of Agrin in sh-NC and sh-Agrin H1975 cells. (right). N = 3; \*\*, p < 0.01; \*\*\*, p < 0.001.

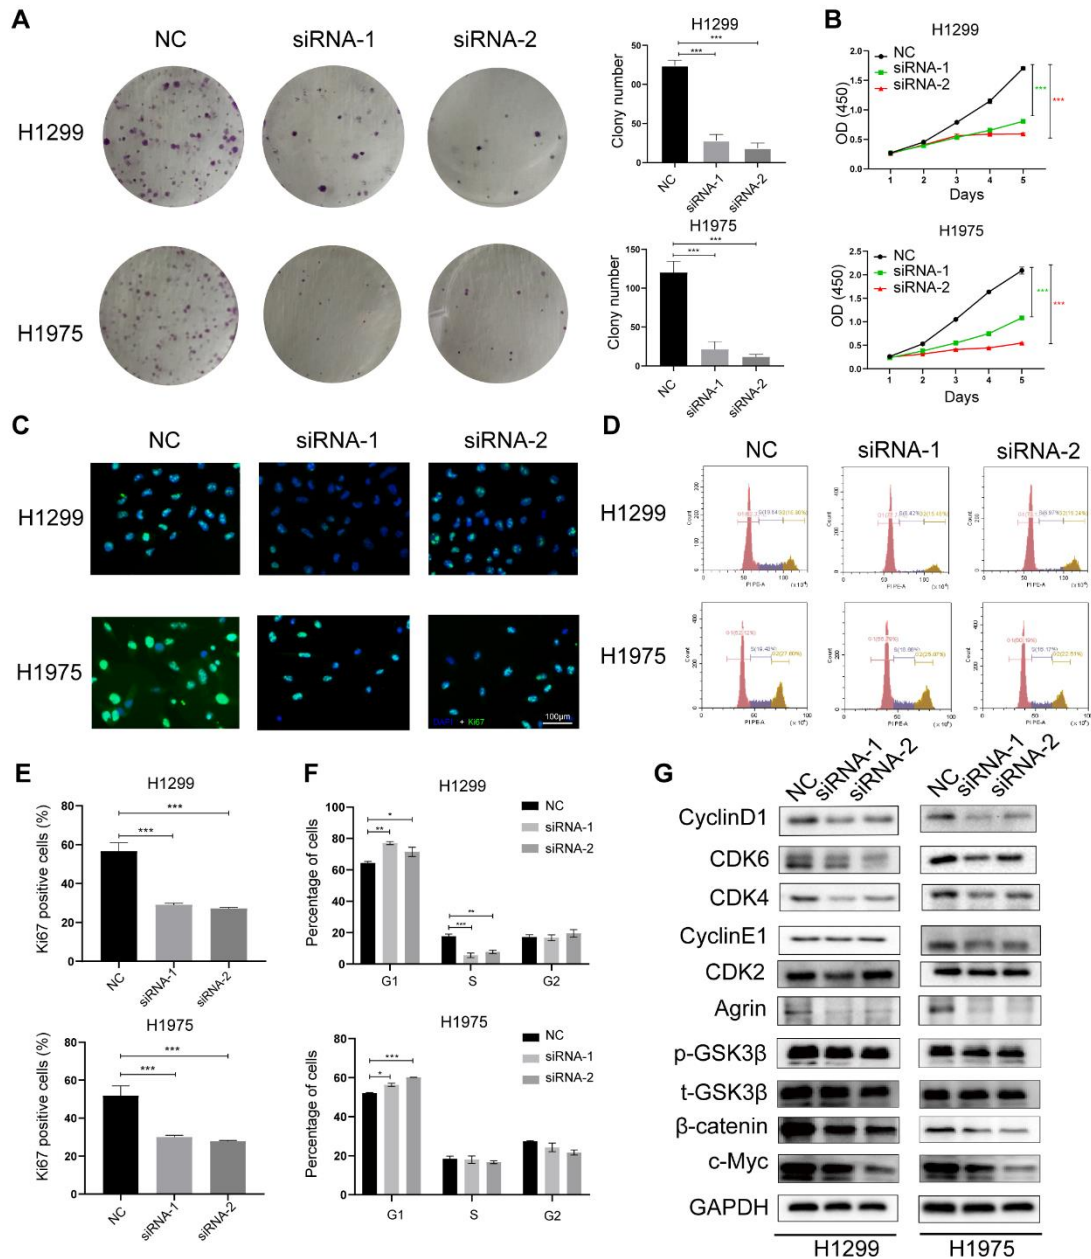

**Figure S2** | Agrin knockdown inhibited NSCLC cell proliferation and induced cell cycle arrest. **(A)** Colony formation assay was used to assess the proliferative ability of NSCLC cells transfected with NC or siRNA. **(B)** OD values of CCK-8 assay in NSCLC cells transfected with NC or siRNA. **(C, E)** Representative images of Ki-67 staining in NSCLC cells transfected with NC or siRNA. The images were taken at 400X magnification. Scale bar, 100  $\mu$ m. **(D, F)** Flow cytometry of cell cycle in NSCLC cells transfected with NC or siRNA. **(G)** Representative immunoblots of Agrin, Cyclin D1, Cyclin E1, CDK2/4/6, p-GSK3 $\beta$ , t-GSK3 $\beta$ ,  $\beta$ -catenin and c-myc proteins. N = 3; \*, P < 0.05, \*\*, P < 0.01, \*\*\*, P < 0.001.

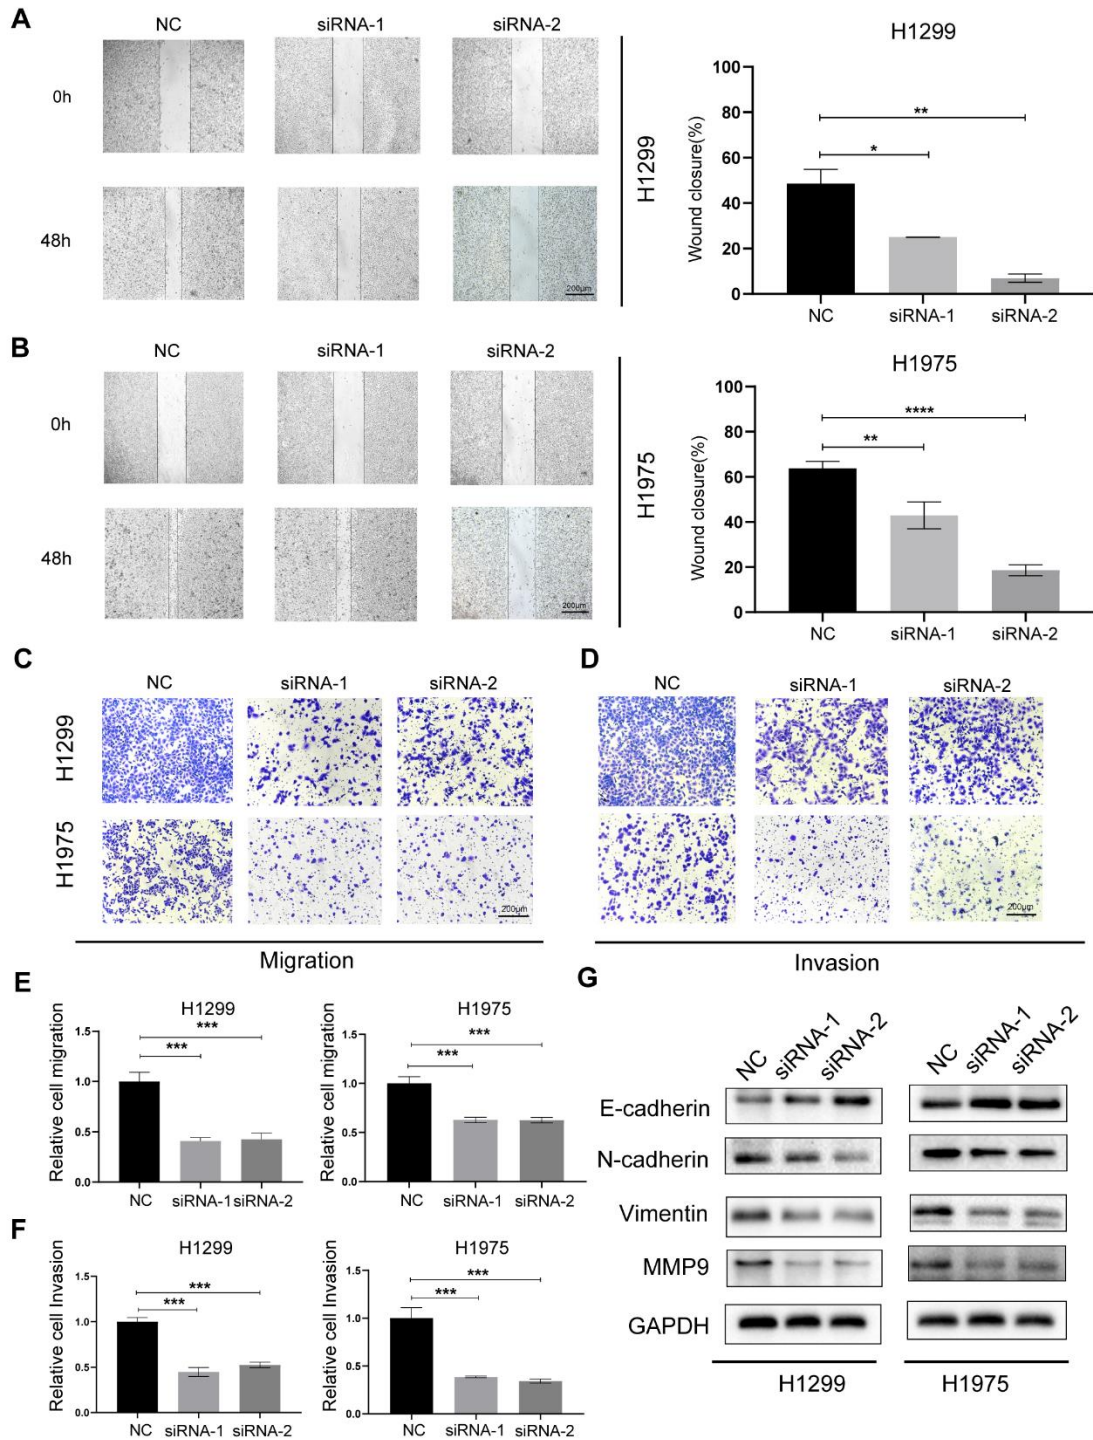

**Figure S3** | Agrin knockdown inhibited NSCLC cell migration and invasion. **(A, B)** Wound healing assay of NSCLC cells transfected with NC or siRNA. The images were taken at 100X magnification. Scale bar, 200  $\mu$ m. **(C-F)** Modified Boyden chamber migration and invasion assay of NSCLC cells transfected with NC or siRNA. Scale bar, 200  $\mu$ m. **(G)** Representative immunoblots of N-Cadherin, E-Cadherin, Vimentin and MMP9. N = 3; \*, P < 0.05; \*\*, P < 0.01; \*\*\*, P < 0.001.

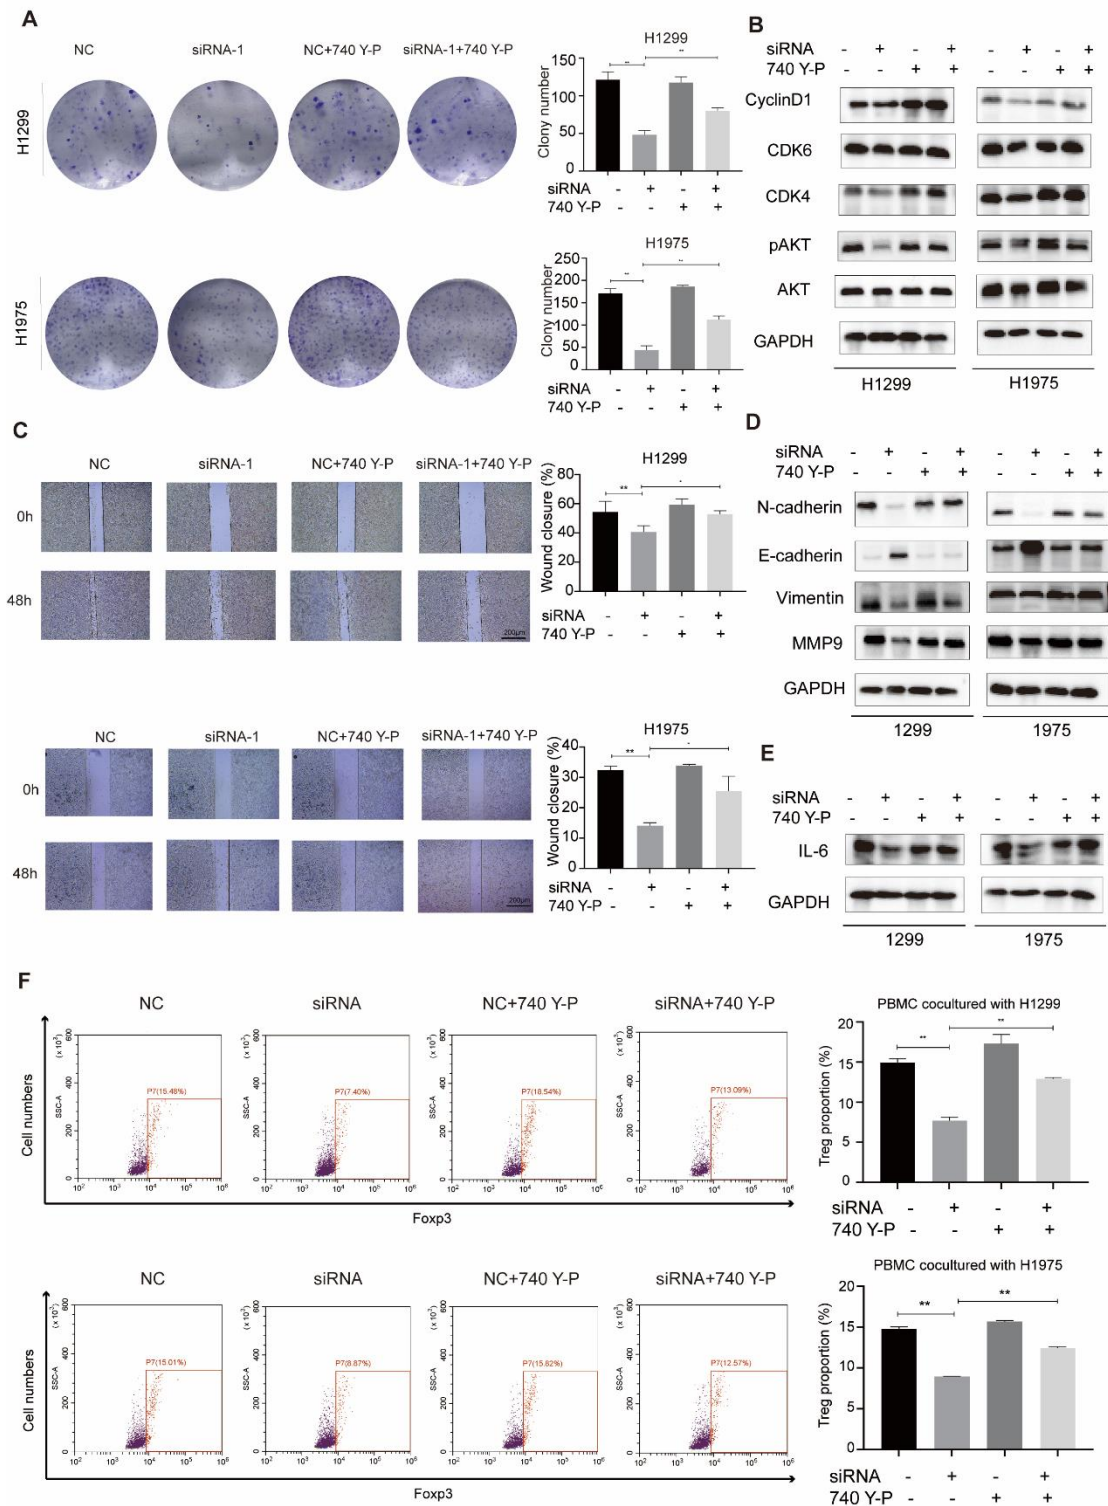

**Figure S4** | PI3K activator 740Y-P rescued NSCLC cell proliferation, migration and Treg cell differentiation in the Agrin-deficient groups. **(A)** 740Y-P (25  $\mu$ g/ml) rescued colony formation inhibited by Agrin deficiency in NSCLC cells. **(B)** Representative immunoblots of Cyclin D1, CDK4/6, pAKT and AKT in NSCLC cells treated with Agrin siRNA and 740Y-P. **(C)** 740Y-P rescued NSCLC cell migration inhibited by Agrin deficiency. **(D)** Representative immunoblots of N-Cadherin, E-Cadherin, Vimentin and MMP9 in NSCLC cells treated with Agrin siRNA and 740Y-P. **(E)** Representative immunoblots of IL-6 in NSCLC cells treated with Agrin siRNA and

740Y-P. **(F)** Flow cytometry of Tregs (CD4+, CD25+, Foxp3+) in PBMCs cocultured with NSCLC cells treated with Agrin siRNA and 740Y-P. N = 3; \*, P < 0.05; \*\*, P < 0.01.

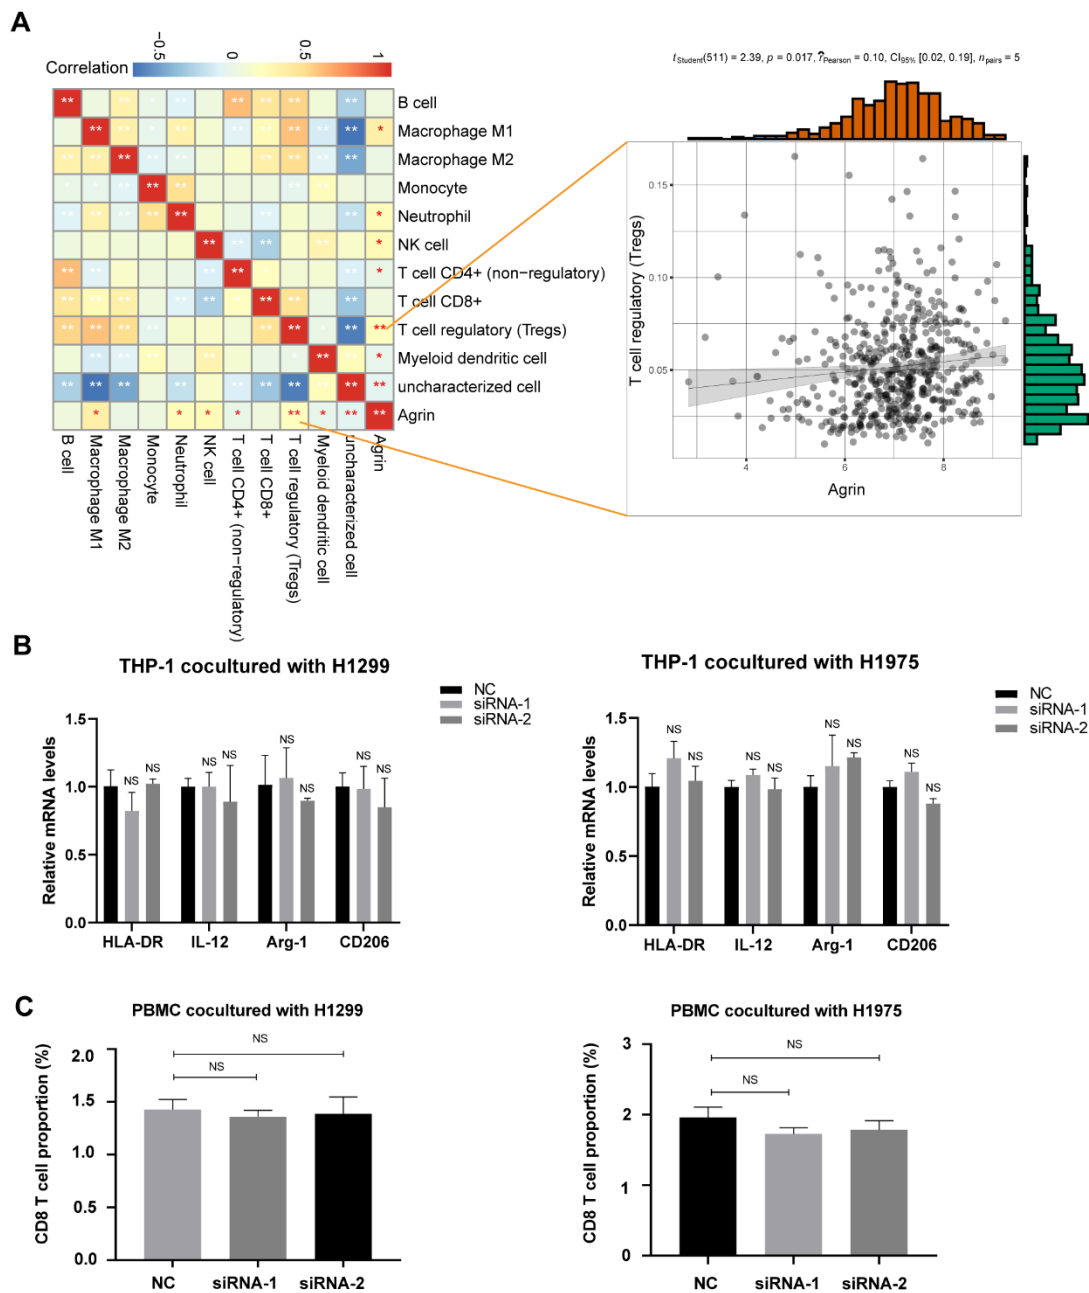

**Supplementary Figure 5** | Correlation between immune cells infiltration and Agrin expression. **(A)** QUANTISEQ algorithm was used to analyze the correlation between immune cell infiltration and Agrin expression. **(B)** Relative expression of macrophage polarization markers (M1: HLA-DR, IL-12; M2: Arg-1, CD206) in THP-1 cells cocultured with NSCLC cells transfected with NC or siRNA. **(C)** Flow cytometry of CD8 T cells in PBMCs cocultured with NSCLC cells treated with NC, or siRNA. N = 3; NS, not significant.
